# Supplementary material
Source: PubMed Central journal article supplement (PMC3078218)

# Supplementary Figure 7

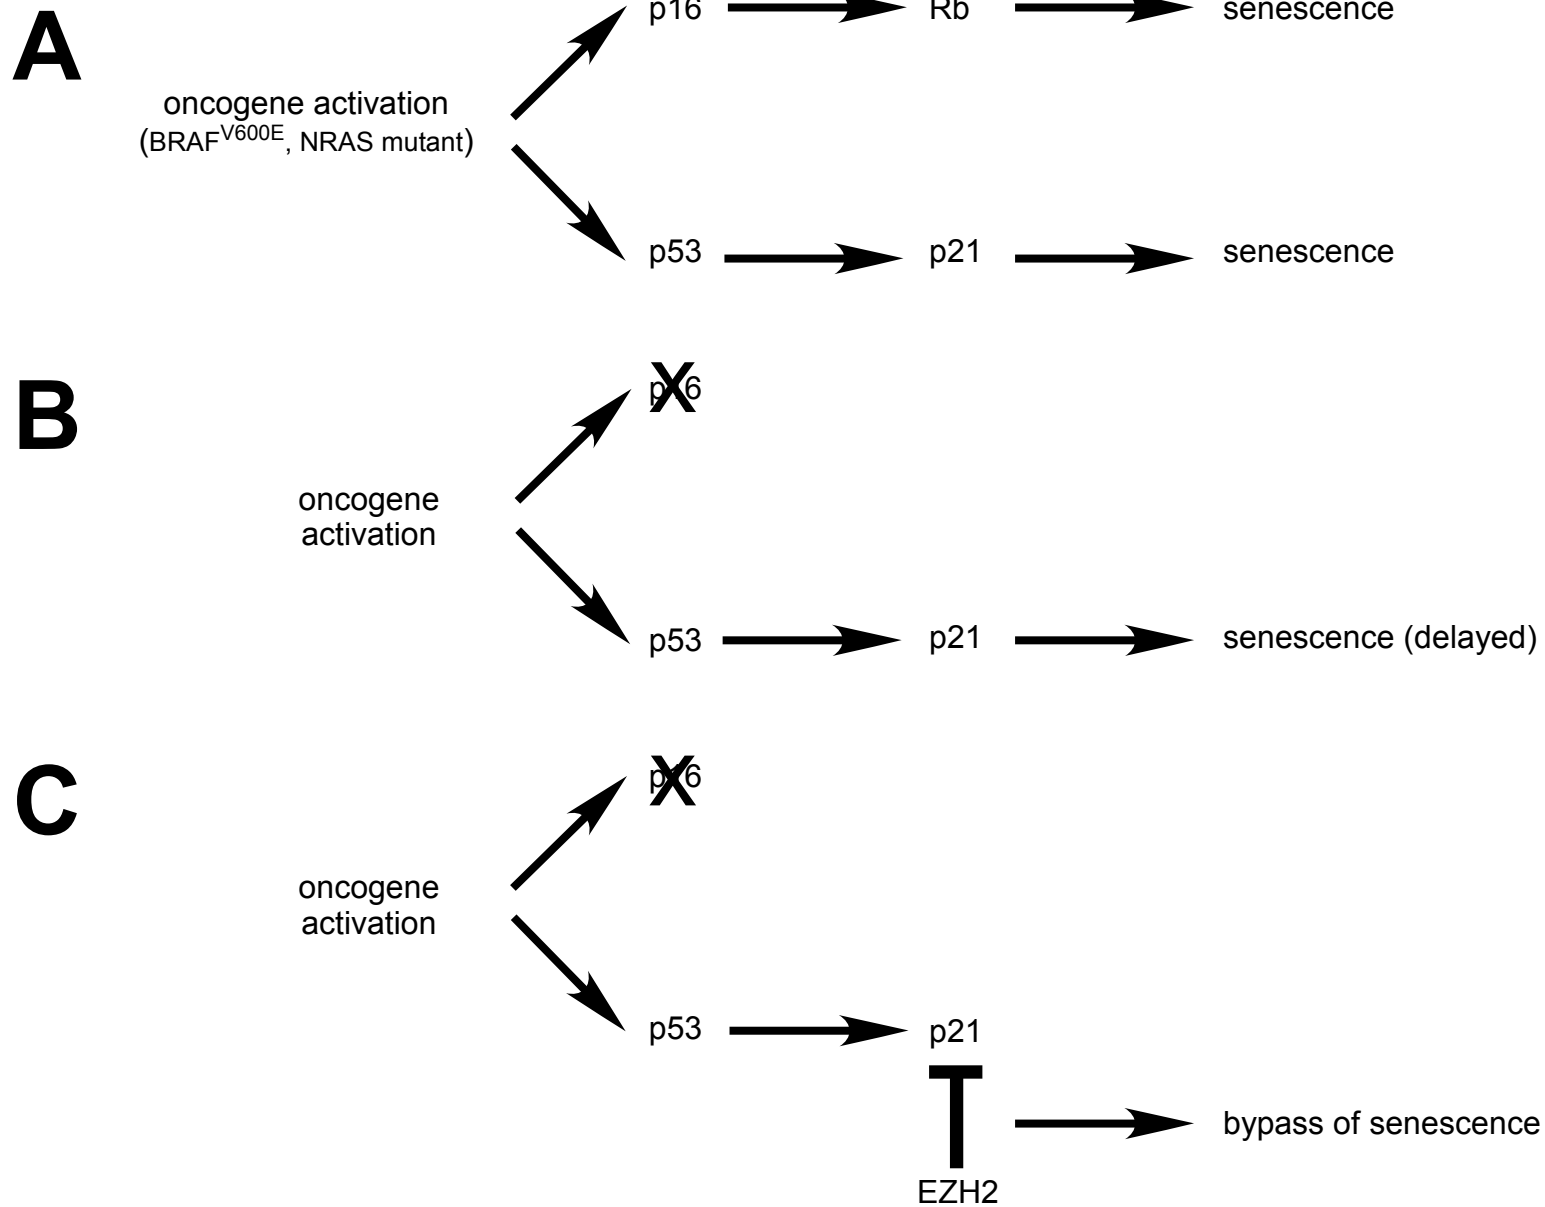

Supplement: NIHMS277861-supplement-8.pdf [file NIHMS277861-supplement-8.pdf]
